# Supplementary material for: The effect of co-substitution of heterovalent ions Ga3+and Sb5+on nonlinear optical properties of phosphate crystals
Source: Royal Society of Chemistry journal article supplement (doi:10.1039/d4ma00067f), 2024-01-01
Supplement: d4ma00067f1.pdf [file d4ma00067f1.pdf]

## Supporting Information

### Effect of Co-substitution of Heterovalent Ions Ga<sup>3+</sup> and Sb<sup>5+</sup> on Nonlinear Optical Effects in Phosphate Crystals

Yutong Zhang<sup>a</sup>, Biao Wang<sup>a</sup>, Xinhui Jia<sup>a</sup>, Xi Chong<sup>a</sup>, Jing Li<sup>\*a</sup>, Bingbing Zhang<sup>\*b</sup>,  
Jiyang Wang<sup>a</sup>

<sup>a</sup> State Key Laboratory of Crystal Materials, Shandong University, Jinan 250100, P. R.  
China.

<sup>b</sup> College of Chemistry and Materials Science, Hebei University, Baoding 071002, P.  
R. China.

\*E-mail: jingli@sdu.edu.cn

\*E-mail: zhangbb@hbu.edu.cn

### CONTENTS

**Figure S1.** High-resolution X-ray photoelectron spectra for O1s core level of KTP.

**Table S1.** Dipole moment calculations for Ga<sup>3+</sup>:Sb<sup>5+</sup>:KTP and KTP.

**Figure S1.** High-resolution X-ray photoelectron spectra for O1s core level of KTP.

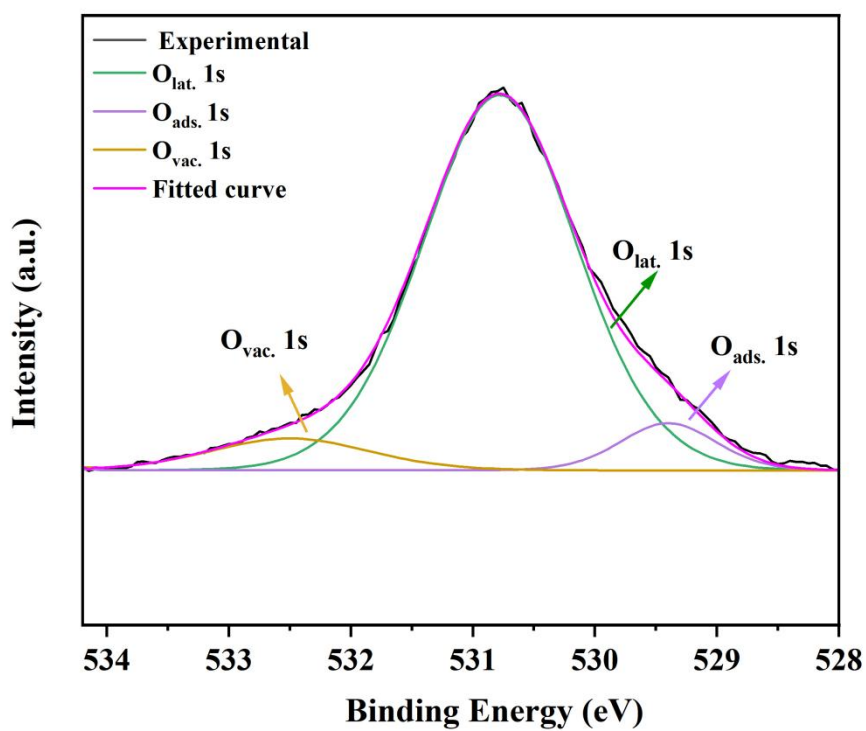

**Table S1.** Dipole moment calculations for Ga<sup>3+</sup>:Sb<sup>5+</sup>:KTP and KTP.

| Species                                 | Dipole Moment |        |       |       | Magnitude                              |
|-----------------------------------------|---------------|--------|-------|-------|----------------------------------------|
|                                         | x(a)          | y(b)   | z(c)  | Debye | $\times 10^{-4}$ esu·cm/Å <sup>3</sup> |
| Ga <sup>3+</sup> :Sb <sup>5+</sup> :KTP |               |        |       |       |                                        |
| Ga-TiO <sub>6</sub> Ti <sub>19</sub>    | -2.611        | 1.381  | 2.497 | 3.867 | 0.002                                  |
| Ga-TiO <sub>6</sub> Ti <sub>35</sub>    | 2.611         | 1.381  | 2.497 | 3.867 | 0.002                                  |
| Sb-TiO <sub>6</sub> Ti <sub>4</sub>     | 5.161         | 2.977  | 3.345 | 6.832 | 0.004                                  |
| Sb-TiO <sub>6</sub> Ti <sub>116</sub>   | -5.161        | 2.977  | 3.345 | 6.832 | 0.004                                  |
| Ga-PO <sub>4</sub> P <sub>37</sub>      | 0.226         | 0.026  | 0.577 | 0.620 | 0.000                                  |
| Ga-PO <sub>4</sub> P <sub>38</sub>      | 0.551         | 0.174  | 0.258 | 0.633 | 0.000                                  |
| Ga-PO <sub>4</sub> P <sub>53</sub>      | 0.226         | 0.026  | 0.577 | 0.620 | 0.000                                  |
| Ga-PO <sub>4</sub> P <sub>102</sub>     | 0.551         | 0.174  | 0.258 | 0.633 | 0.000                                  |
| Sb-PO <sub>4</sub> P <sub>117</sub>     | 0.226         | 0.026  | 0.577 | 0.620 | 0.000                                  |
| Sb-PO <sub>4</sub> P <sub>118</sub>     | 0.551         | 0.174  | 0.258 | 0.633 | 0.000                                  |
| Sb-PO <sub>4</sub> P <sub>84</sub>      | 0.226         | 0.026  | 0.577 | 0.620 | 0.000                                  |
| Sb-PO <sub>4</sub> P <sub>70</sub>      | 0.551         | 0.174  | 0.258 | 0.633 | 0.000                                  |
| SbO <sub>6</sub>                        | -1.32         | 0.05   | 0.54  | 1.43  | 0.000                                  |
| GaO <sub>6</sub>                        | 0.30          | -0.83  | 0.38  | 0.97  | 0.000                                  |
| Pure KTP                                |               |        |       |       |                                        |
| TiO <sub>6</sub> Ti <sub>8</sub>        | 0.886         | -0.468 | 0.847 | 1.312 | 0.001                                  |
| TiO <sub>6</sub> Ti <sub>12</sub>       | 1.751         | 1.010  | 1.135 | 2.318 | 0.001                                  |
| PO <sub>4</sub> P <sub>16</sub>         | -0.321        | -0.036 | 0.819 | 0.881 | 0.001                                  |
| PO <sub>4</sub> P <sub>20</sub>         | 0.783         | -0.246 | 0.367 | 0.899 | 0.001                                  |
